# Supplementary material for: Profiling and initial validation of urinary microRNAs as biomarkers in IgA nephropathy
Source: PeerJ. 2015 Jun 2;3:e990. doi: 10.7717/peerj.990 (PMC4458130; doi:10.7717/peerj.990)
Supplement: Table S1 — IgAN, IgA nephropathy; HC, healthy control; FC, fold change. [file peerj-03-990-s002.xlsx]

## Sheet: Table S1
Table S1. Differentially expressed miRNAs in IgAN compared against HC.
miRNA	P value	FC		miRNA	P value	FC
hsa-miR-150-5p	<0.001	41.6		hsa-miR-221-3p	0.005	4.58
hsa-miR-16-5p	<0.001	37.25		hsa-miR-361-5p	0.005	4.55
hsa-miR-451a	<0.001	31.06		hsa-miR-181a-5p	<0.001	4.53
hsa-miR-146a-5p	<0.001	23		hsa-miR-505-5p	<0.001	4.52
hsa-miR-143-3p	<0.001	22.36		hsa-miR-629-5p	0.008	4.4
hsa-miR-126-3p	<0.001	21.8		hsa-miR-151a-5p	0.011	4.34
hsa-miR-15a-5p	<0.001	20.08		hsa-miR-140-5p	0.008	4.23
hsa-miR-223-3p	<0.001	19.05		hsa-miR-125a-5p	0.008	4.18
hsa-miR-15b-5p	<0.001	18.71		hsa-miR-93-5p	0.037	4.16
hsa-miR-25-3p	<0.001	18.46		hsa-miR-503-5p	<0.001	4.14
hsa-miR-145-5p	<0.001	17.89		hsa-miR-152-3p	0.011	4.13
hsa-miR-23a-3p	<0.001	16.78		hsa-miR-652-3p	0.008	4.05
hsa-miR-106b-5p	<0.001	16.13		hsa-miR-130b-3p	0.005	3.96
hsa-miR-20a-5p	<0.001	16.12		hsa-miR-28-3p	<0.001	3.93
hsa-let-7i-5p	<0.001	15.55		hsa-miR-30a-5p	0.04	3.93
hsa-miR-19b-3p	<0.001	14.69		hsa-miR-30c-5p	0.037	3.92
hsa-miR-155-5p	<0.001	14.5		hsa-miR-181b-5p	<0.001	3.88
hsa-miR-146b-5p	<0.001	13.59		hsa-miR-27b-3p	0.028	3.87
hsa-let-7a-5p	<0.001	12.94		hsa-miR-151b	0.021	3.83
hsa-miR-132-3p	<0.001	12.28		hsa-miR-10a-5p	0.037	3.82
hsa-miR-26a-5p	<0.001	11.92		hsa-miR-10b-5p	0.037	3.78
hsa-miR-486-5p	0.011	10.86		hsa-miR-548a-3p	0.008	3.6
hsa-let-7g-5p	<0.001	10.72		hsa-miR-331-3p	0.005	3.56
hsa-miR-342-5p	<0.001	10.5		hsa-miR-324-5p	0.008	3.53
hsa-miR-107	<0.001	10.49		hsa-miR-501-5p	0.011	3.51
hsa-miR-18a-5p	<0.001	10.24		hsa-miR-30b-5p	0.04	3.43
hsa-miR-425-5p	<0.001	10.04		hsa-miR-1246	0.021	3.41
hsa-miR-20b-5p	<0.001	9.92		hsa-miR-6515-5p	0.041	3.35
hsa-let-7d-5p	<0.001	8.68		hsa-miR-455-3p	<0.001	3.25
hsa-miR-103a-3p	<0.001	8.61		hsa-miR-486-3p	0.04	3.21
hsa-miR-660-5p	<0.001	8.17		hsa-miR-125b-5p	0.037	3.09
hsa-miR-363-3p	<0.001	7.87		hsa-miR-199a-3p	0.028	3.04
hsa-miR-191-5p	<0.001	7.81		hsa-miR-199b-3p	0.028	3.04
hsa-miR-28-5p	<0.001	7.51		hsa-let-7e-5p	0.041	2.96
hsa-miR-106a-5p	<0.001	7.15		hsa-miR-29b-2-5p	0.028	2.95
hsa-let-7c-5p	0.005	7.09		hsa-miR-30d-5p	0.046	2.91
hsa-miR-140-3p	<0.001	7.01		hsa-miR-93-3p	0.028	2.89
hsa-miR-17-5p	<0.001	6.94		hsa-miR-339-3p	0.037	2.88
hsa-miR-27a-3p	0.005	6.76		hsa-miR-24-2-5p	0.037	2.76
hsa-miR-214-3p	<0.001	6.72		hsa-miR-424-3p	0.037	2.75
hsa-miR-185-5p	0.011	6.55		hsa-miR-320e	0.019	2.74
hsa-miR-130a-3p	<0.001	6.41		hsa-miR-421	0.037	2.67
hsa-miR-342-3p	<0.001	6.1		hsa-miR-26b-5p	0.047	2.67
hsa-miR-29a-3p	<0.001	5.7		hsa-miR-128-3p	0.028	2.57
hsa-miR-24-3p	0.011	5.67		hsa-miR-188-5p	0.008	2.56
hsa-miR-106b-3p	<0.001	5.5		hsa-miR-30e-3p	0.037	2.47
hsa-miR-22-3p	0.005	5.49		hsa-miR-628-3p	0.028	2.42
hsa-miR-200a-3p	0.014	5.27		hsa-miR-29c-5p	0.021	2.38
hsa-miR-4306	0.005	5.25		hsa-miR-339-5p	0.047	2.38
hsa-miR-17-3p	<0.001	5.23		hsa-miR-550a-3-5p	0.016	2.37
hsa-miR-18b-5p	0.005	5.2		hsa-miR-181c-5p	0.016	2.29
hsa-miR-194-5p	0.026	5.19		hsa-miR-664b-3p	0.037	2.26
hsa-miR-30e-5p	0.008	5.08		hsa-miR-320d	0.037	2.26
hsa-miR-23b-3p	0.008	5		hsa-miR-3609	0.046	2.22
hsa-let-7b-5p	0.021	5		hsa-miR-181a-2-3p	0.016	2.17
hsa-miR-19a-3p	0.005	4.84		hsa-miR-550b-2-5p	0.005	2.14
hsa-miR-92a-3p	0.005	4.79		hsa-miR-3135b	0.011	2.11
hsa-miR-182-5p	0.005	4.74		hsa-miR-548ae	0.008	2.07
hsa-miR-222-3p	0.005	4.71
IgAN, IgA nephropathy; HC, healthy control; FC, fold change.
