# Supplementary material for: Profiling and initial validation of urinary microRNAs as biomarkers in IgA nephropathy
Source: PeerJ. 2015 Jun 2;3:e990. doi: 10.7717/peerj.990 (PMC4458130; doi:10.7717/peerj.990)
Supplement: Table S3 — IgAN, IgA nephropathy; MCD, minimal change disease; FC, fold change. [file peerj-03-990-s004.xlsx]

## Sheet: Table S3
Table S3. Differentially expressed miRNAs in IgAN compared against MCD.
miRNA	P value	FC		miRNA	P value	FC
hsa-miR-124-3p	<0.001	0.1		hsa-miR-204-3p	<0.001	0.25
hsa-miR-429	<0.001	0.14		hsa-miR-27b-5p	<0.001	0.26
hsa-miR-3065-3p	<0.001	0.15		hsa-miR-196b-3p	<0.001	0.27
hsa-miR-21-5p	<0.001	0.17		hsa-miR-6723-5p	<0.001	0.31
hsa-miR-215-5p	<0.001	0.17		hsa-miR-378b	<0.001	0.35
hsa-miR-335-5p	<0.001	0.21
IgAN, IgA nephropathy; MCD, minimal change disease; FC, fold change.
