# Supplementary material for: Profiling and initial validation of urinary microRNAs as biomarkers in IgA nephropathy
Source: PeerJ. 2015 Jun 2;3:e990. doi: 10.7717/peerj.990 (PMC4458130; doi:10.7717/peerj.990)
Supplement: Table S4 — GO, Gene Ontology; BP, biology process. [file peerj-03-990-s005.xlsx]

## Sheet: Table S4
Table S4. The significant GO Biological Processes for miR-3613-3p.
Term	P Value
GO:0045449~regulation of transcription	<0.001
GO:0006350~transcription	<0.001
GO:0010604~positive regulation of macromolecule metabolic process	<0.001
GO:0010557~positive regulation of macromolecule biosynthetic process	<0.001
GO:0009891~positive regulation of biosynthetic process	<0.001
GO:0051252~regulation of RNA metabolic process	<0.001
GO:0031328~positive regulation of cellular biosynthetic process	<0.001
GO:0010628~positive regulation of gene expression	<0.001
GO:0045941~positive regulation of transcription	<0.001
GO:0045935~positive regulation of nucleobase, nucleoside, nucleotide and nucleic acid metabolic process	<0.001
GO:0006355~regulation of transcription, DNA-dependent	<0.001
GO:0051173~positive regulation of nitrogen compound metabolic process	<0.001
GO:0006357~regulation of transcription from RNA polymerase II promoter	<0.001
GO:0045893~positive regulation of transcription, DNA-dependent	<0.001
GO:0051254~positive regulation of RNA metabolic process	<0.001
GO:0010629~negative regulation of gene expression	<0.001
GO:0016481~negative regulation of transcription	<0.001
GO:0031327~negative regulation of cellular biosynthetic process	<0.001
GO:0010605~negative regulation of macromolecule metabolic process	<0.001
GO:0010558~negative regulation of macromolecule biosynthetic process	<0.001
GO:0009890~negative regulation of biosynthetic process	<0.001
GO:0045944~positive regulation of transcription from RNA polymerase II promoter	<0.001
GO:0045934~negative regulation of nucleobase, nucleoside, nucleotide and nucleic acid metabolic process	<0.001
GO:0051172~negative regulation of nitrogen compound metabolic process	<0.001
GO:0045892~negative regulation of transcription, DNA-dependent	<0.001
GO:0051253~negative regulation of RNA metabolic process	<0.001
GO:0016071~mRNA metabolic process	<0.001
GO:0006366~transcription from RNA polymerase II promoter	<0.001
GO:0043255~regulation of carbohydrate biosynthetic process	<0.001
GO:0006351~transcription, DNA-dependent	<0.001
GO:0032774~RNA biosynthetic process	<0.001
GO:0006397~mRNA processing	<0.001
GO:0032268~regulation of cellular protein metabolic process	<0.001
GO:0006325~chromatin organization	<0.001
GO:0035295~tube development	<0.001
GO:0016568~chromatin modification	<0.001
GO:0000122~negative regulation of transcription from RNA polymerase II promoter	<0.001
GO:0007507~heart development	<0.001
GO:0045596~negative regulation of cell differentiation	<0.001
GO:0005979~regulation of glycogen biosynthetic process	<0.001
GO:0010962~regulation of glucan biosynthetic process	<0.001
GO:0032885~regulation of polysaccharide biosynthetic process	<0.001
GO:0001889~liver development	<0.001
GO:0032881~regulation of polysaccharide metabolic process	<0.001
GO:0010608~posttranscriptional regulation of gene expression	<0.001
GO:0030518~steroid hormone receptor signaling pathway	<0.001
GO:0030324~lung development	<0.001
GO:0010906~regulation of glucose metabolic process	<0.001
GO:0030323~respiratory tube development	<0.001
GO:0045664~regulation of neuron differentiation	<0.001
GO:0045725~positive regulation of glycogen biosynthetic process	<0.001
GO:0006468~protein amino acid phosphorylation	<0.001
GO:0010675~regulation of cellular carbohydrate metabolic process	<0.001
GO:0060284~regulation of cell development	<0.001
GO:0006109~regulation of carbohydrate metabolic process	<0.001
GO:0060541~respiratory system development	<0.001
GO:0009952~anterior/posterior pattern formation	<0.001
GO:0007167~enzyme linked receptor protein signaling pathway	<0.001
GO:0010907~positive regulation of glucose metabolic process	<0.001
GO:0044265~cellular macromolecule catabolic process	<0.001
GO:0010676~positive regulation of cellular carbohydrate metabolic process	<0.001
GO:0045913~positive regulation of carbohydrate metabolic process	<0.001
GO:0006605~protein targeting	0.001
GO:0051603~proteolysis involved in cellular protein catabolic process	0.001
GO:0044257~cellular protein catabolic process	0.001
GO:0008284~positive regulation of cell proliferation	0.001
GO:0050767~regulation of neurogenesis	0.001
GO:0010552~positive regulation of specific transcription from RNA polymerase II promoter	0.001
GO:0051276~chromosome organization	0.001
GO:0043632~modification-dependent macromolecule catabolic process	0.001
GO:0019941~modification-dependent protein catabolic process	0.001
GO:0008380~RNA splicing	0.001
GO:0030163~protein catabolic process	0.001
GO:0009057~macromolecule catabolic process	0.001
GO:0030522~intracellular receptor-mediated signaling pathway	0.001
GO:0001892~embryonic placenta development	0.001
GO:0043009~chordate embryonic development	0.001
GO:0060537~muscle tissue development	0.001
GO:0070647~protein modification by small protein conjugation or removal	0.001
GO:0009792~embryonic development ending in birth or egg hatching	0.001
GO:0016569~covalent chromatin modification	0.001
GO:0034504~protein localization in nucleus	0.002
GO:0001829~trophectodermal cell differentiation	0.002
GO:0060538~skeletal muscle organ development	0.002
GO:0007519~skeletal muscle tissue development	0.002
GO:0017038~protein import	0.002
GO:0030177~positive regulation of Wnt receptor signaling pathway	0.002
GO:0007169~transmembrane receptor protein tyrosine kinase signaling pathway	0.002
GO:0002053~positive regulation of mesenchymal cell proliferation	0.002
GO:0034613~cellular protein localization	0.002
GO:0007389~pattern specification process	0.003
GO:0046320~regulation of fatty acid oxidation	0.003
GO:0000375~RNA splicing, via transesterification reactions	0.003
GO:0000377~RNA splicing, via transesterification reactions with bulged adenosine as nucleophile	0.003
GO:0000398~nuclear mRNA splicing, via spliceosome	0.003
GO:0070727~cellular macromolecule localization	0.003
GO:0046777~protein amino acid autophosphorylation	0.003
GO:0030182~neuron differentiation	0.003
GO:0016310~phosphorylation	0.003
GO:0051960~regulation of nervous system development	0.003
GO:0006606~protein import into nucleus	0.003
GO:0006417~regulation of translation	0.003
GO:0001944~vasculature development	0.003
GO:0010464~regulation of mesenchymal cell proliferation	0.003
GO:0048745~smooth muscle tissue development	0.003
GO:0051329~interphase of mitotic cell cycle	0.003
GO:0000082~G1/S transition of mitotic cell cycle	0.003
GO:0043193~positive regulation of gene-specific transcription	0.003
GO:0000902~cell morphogenesis	0.003
GO:0051170~nuclear import	0.003
GO:0010565~regulation of cellular ketone metabolic process	0.003
GO:0043467~regulation of generation of precursor metabolites and energy	0.003
GO:0016570~histone modification	0.003
GO:0042127~regulation of cell proliferation	0.004
GO:0048666~neuron development	0.004
GO:0051325~interphase	0.004
GO:0030325~adrenal gland development	0.004
GO:0051130~positive regulation of cellular component organization	0.004
GO:0001825~blastocyst formation	0.004
GO:0035239~tube morphogenesis	0.005
GO:0033365~protein localization in organelle	0.005
GO:0006396~RNA processing	0.005
GO:0046324~regulation of glucose import	0.005
GO:0032409~regulation of transporter activity	0.005
GO:0045665~negative regulation of neuron differentiation	0.005
GO:0010551~regulation of specific transcription from RNA polymerase II promoter	0.005
GO:0001568~blood vessel development	0.005
GO:0048598~embryonic morphogenesis	0.005
GO:0010827~regulation of glucose transport	0.006
GO:0030183~B cell differentiation	0.006
GO:0032446~protein modification by small protein conjugation	0.006
GO:0010828~positive regulation of glucose transport	0.006
GO:0046326~positive regulation of glucose import	0.006
GO:0019217~regulation of fatty acid metabolic process	0.007
GO:0030900~forebrain development	0.007
GO:0032583~regulation of gene-specific transcription	0.007
GO:0048754~branching morphogenesis of a tube	0.007
GO:0031399~regulation of protein modification process	0.007
GO:0051270~regulation of cell motion	0.008
GO:0002520~immune system development	0.008
GO:0032868~response to insulin stimulus	0.008
GO:0031175~neuron projection development	0.008
GO:0006913~nucleocytoplasmic transport	0.008
GO:0030097~hemopoiesis	0.008
GO:0002009~morphogenesis of an epithelium	0.008
GO:0014706~striated muscle tissue development	0.008
GO:0016567~protein ubiquitination	0.008
GO:0006793~phosphorus metabolic process	0.009
GO:0006796~phosphate metabolic process	0.009
GO:0008286~insulin receptor signaling pathway	0.009
GO:0042981~regulation of apoptosis	0.009
GO:0006512~ubiquitin cycle	0.009
GO:0033043~regulation of organelle organization	0.009
GO:0003002~regionalization	0.009
GO:0060485~mesenchyme development	0.009
GO:0051291~protein heterooligomerization	0.009
GO:0051169~nuclear transport	0.009
GO:0032869~cellular response to insulin stimulus	0.009
GO:0045165~cell fate commitment	0.009
GO:0031056~regulation of histone modification	0.009
GO:0048534~hemopoietic or lymphoid organ development	0.009
GO:0030098~lymphocyte differentiation	0.01
GO:0030030~cell projection organization	0.01
GO:0043067~regulation of programmed cell death	0.01
GO:0010941~regulation of cell death	0.011
GO:0051174~regulation of phosphorus metabolic process	0.011
GO:0019220~regulation of phosphate metabolic process	0.011
GO:0010560~positive regulation of glycoprotein biosynthetic process	0.011
GO:0035065~regulation of histone acetylation	0.011
GO:0000904~cell morphogenesis involved in differentiation	0.011
GO:0032410~negative regulation of transporter activity	0.011
GO:0032989~cellular component morphogenesis	0.011
GO:0006886~intracellular protein transport	0.012
GO:0048858~cell projection morphogenesis	0.012
GO:0042325~regulation of phosphorylation	0.012
GO:0006338~chromatin remodeling	0.013
GO:0016458~gene silencing	0.013
GO:0006916~anti-apoptosis	0.013
GO:0045787~positive regulation of cell cycle	0.014
GO:0001763~morphogenesis of a branching structure	0.014
GO:0030334~regulation of cell migration	0.015
GO:0009967~positive regulation of signal transduction	0.015
GO:0048514~blood vessel morphogenesis	0.016
GO:0002521~leukocyte differentiation	0.016
GO:0042113~B cell activation	0.016
GO:0060136~embryonic process involved in female pregnancy	0.016
GO:0045662~negative regulation of myoblast differentiation	0.016
GO:0051148~negative regulation of muscle cell differentiation	0.017
GO:0040012~regulation of locomotion	0.017
GO:0048812~neuron projection morphogenesis	0.017
GO:0032990~cell part morphogenesis	0.017
GO:0007409~axonogenesis	0.017
GO:0040029~regulation of gene expression, epigenetic	0.017
GO:0001890~placenta development	0.018
GO:0001932~regulation of protein amino acid phosphorylation	0.018
GO:0042493~response to drug	0.019
GO:0000278~mitotic cell cycle	0.019
GO:0033044~regulation of chromosome organization	0.019
GO:0048732~gland development	0.019
GO:0060070~Wnt receptor signaling pathway through beta-catenin	0.02
GO:0051272~positive regulation of cell motion	0.021
GO:0010647~positive regulation of cell communication	0.021
GO:0007242~intracellular signaling cascade	0.022
GO:0006474~N-terminal protein amino acid acetylation	0.023
GO:0031057~negative regulation of histone modification	0.023
GO:0014065~phosphoinositide 3-kinase cascade	0.023
GO:0043066~negative regulation of apoptosis	0.023
GO:0048729~tissue morphogenesis	0.023
GO:0010639~negative regulation of organelle organization	0.024
GO:0035282~segmentation	0.025
GO:0043069~negative regulation of programmed cell death	0.026
GO:0051129~negative regulation of cellular component organization	0.026
GO:0030036~actin cytoskeleton organization	0.026
GO:0060548~negative regulation of cell death	0.027
GO:0045445~myoblast differentiation	0.027
GO:0007178~transmembrane receptor protein serine/threonine kinase signaling pathway	0.027
GO:0060562~epithelial tube morphogenesis	0.029
GO:0045597~positive regulation of cell differentiation	0.029
GO:0001756~somitogenesis	0.029
GO:0045737~positive regulation of cyclin-dependent protein kinase activity	0.029
GO:0046321~positive regulation of fatty acid oxidation	0.029
GO:0060314~regulation of ryanodine-sensitive calcium-release channel activity	0.029
GO:0048667~cell morphogenesis involved in neuron differentiation	0.031
GO:0033674~positive regulation of kinase activity	0.031
GO:0048762~mesenchymal cell differentiation	0.031
GO:0001708~cell fate specification	0.031
GO:0014031~mesenchymal cell development	0.031
GO:0035270~endocrine system development	0.032
GO:0043010~camera-type eye development	0.033
GO:0007517~muscle organ development	0.033
GO:0046907~intracellular transport	0.033
GO:0001525~angiogenesis	0.034
GO:0045637~regulation of myeloid cell differentiation	0.034
GO:0030521~androgen receptor signaling pathway	0.035
GO:0043408~regulation of MAPKKK cascade	0.036
GO:0045444~fat cell differentiation	0.036
GO:0048009~insulin-like growth factor receptor signaling pathway	0.037
GO:0042447~hormone catabolic process	0.037
GO:0045749~negative regulation of S phase of mitotic cell cycle	0.037
GO:0048538~thymus development	0.039
GO:0043488~regulation of mRNA stability	0.039
GO:0001654~eye development	0.041
GO:0051347~positive regulation of transferase activity	0.041
GO:0019216~regulation of lipid metabolic process	0.041
GO:0009187~cyclic nucleotide metabolic process	0.042
GO:0030029~actin filament-based process	0.042
GO:0032870~cellular response to hormone stimulus	0.042
GO:0001666~response to hypoxia	0.044
GO:0022610~biological adhesion	0.046
GO:0007155~cell adhesion	0.048
GO:0045860~positive regulation of protein kinase activity	0.048
GO:0032412~regulation of ion transmembrane transporter activity	0.049
GO:0043487~regulation of RNA stability	0.049
GO:0032269~negative regulation of cellular protein metabolic process	0.049
GO, Gene Ontology; BP, biology process.
